# Supplementary material for: Structural evolution from Bi4.2K0.8Fe2O9+δnanobelts to BiFeO3nanochains in vacuum and their multiferroic properties
Source: Royal Society of Chemistry journal article supplement (doi:10.1039/c4nr03148b), 2014-10-14
Supplement: c4nr03148b1.pdf [file c4nr03148b1.pdf]

## Supplementary Information

### Structural evolution from $\text{Bi}_{4.2}\text{K}_{0.8}\text{Fe}_2\text{O}_{9+\delta}$ nanobelts to $\text{BiFeO}_3$ nanochains in vacuum and their multiferroic properties

*Sining Dong<sup>1,2</sup>, Dalong Zhang<sup>1</sup>, Yukuai Liu<sup>1</sup>, Shengwei Yang<sup>1</sup>, Tao Jiang<sup>1</sup>, Yuwei Yin<sup>1</sup> and Xiaoguang Li<sup>1,\*</sup>*

<sup>1</sup>Hefei National Laboratory for Physical Sciences at Microscale, Department of Physics, CAS Key Lab Mat Energy Convers, University of Science and Technology of China, Hefei 230026, P. R. China

<sup>2</sup>Department of Physics, University of Notre Dame, Indiana 46556, USA

\* E-mail: [lixg@ustc.edu.cn](mailto:lixg@ustc.edu.cn)

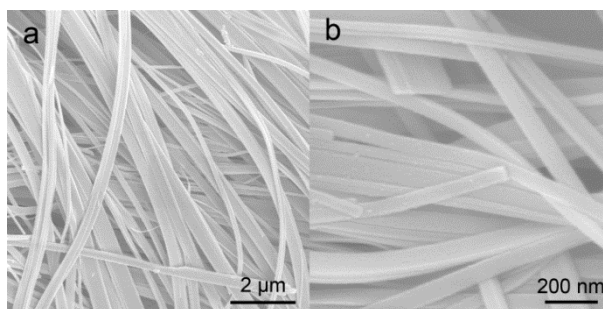

**Figure S1.** FE-SEM images of the BKFO nanobelts with different magnifications.

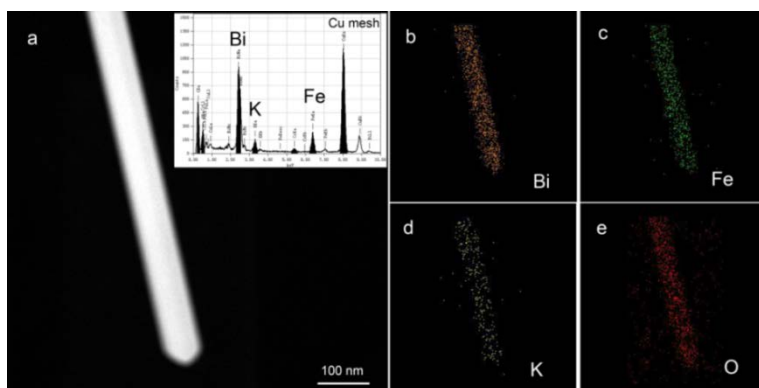

**Figure S2.** HAADF image (a) and EDX elemental maps (b–e) of a single BKFO nanobelt. Inset of (a) is the EDX spectrum.

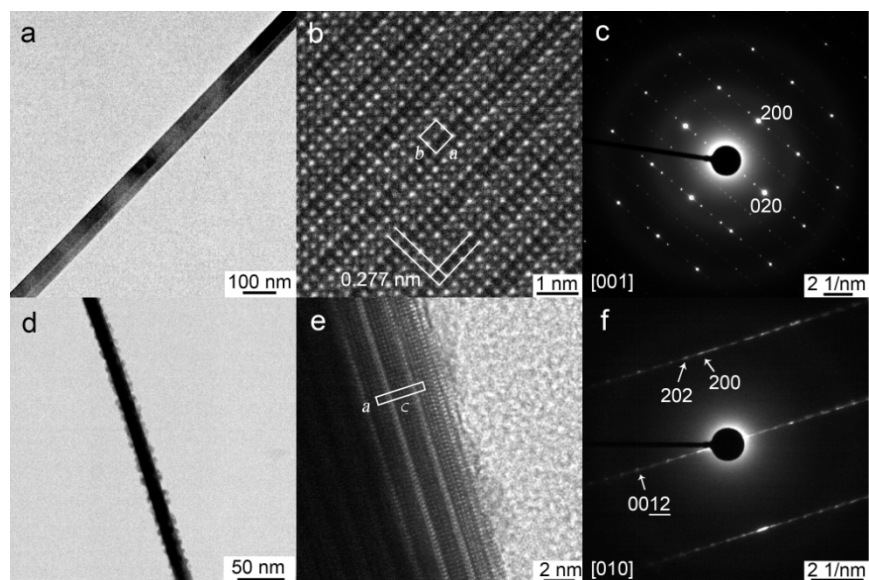

**Figure S3.** Typical TEM images, HR-TEM images and SAED patterns of  $\text{Bi}_{4.2}\text{K}_{0.8}\text{Fe}_2\text{O}_{9+\delta}$  nanobelts for the [001] zone axis (a–c) and [010] zone axis (d–f).

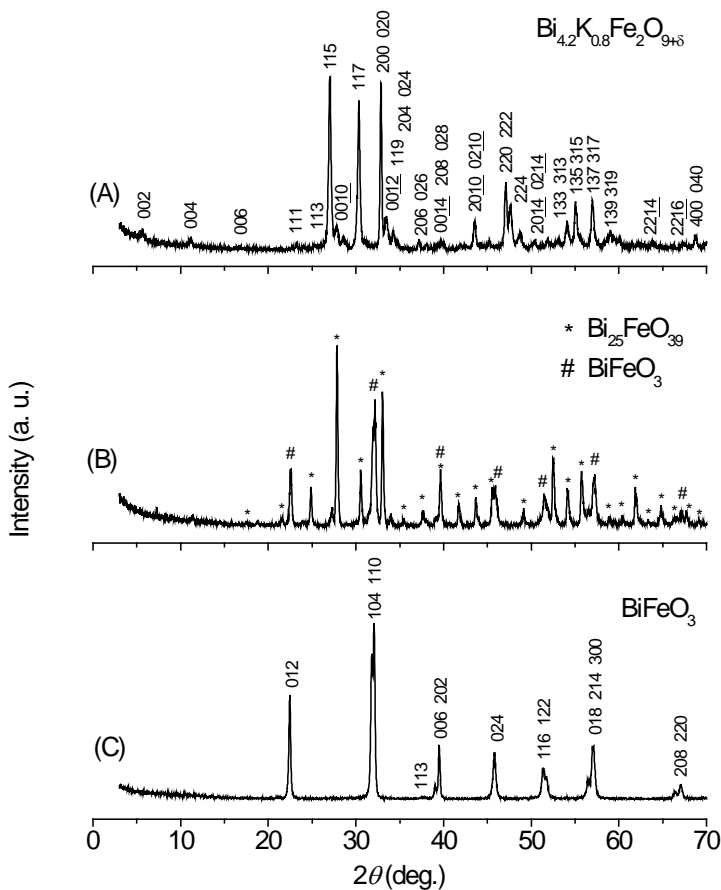

**Figure S4.** XRD patterns of as-prepared BKFO nanobelts (A), powders after 500 °C vacuum annealing for 2 hours (B), and BFO nanochains (C).

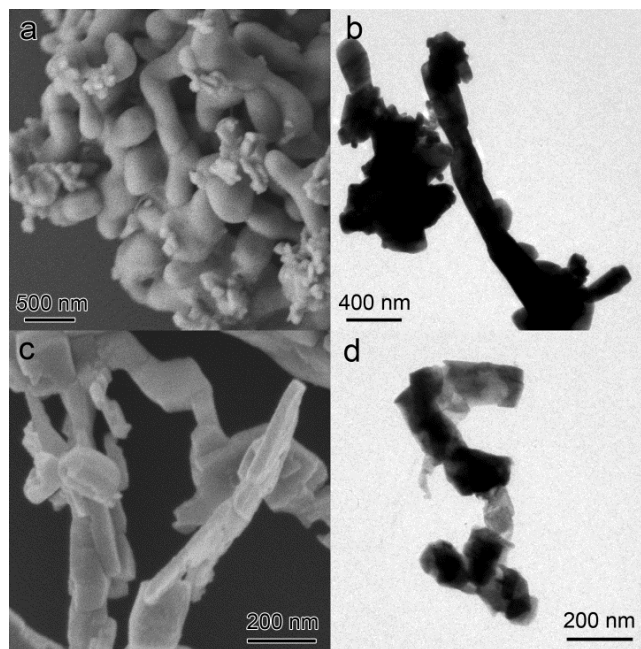

**Figure S5.** FE-SEM and TEM images of vacuum annealed samples (a, b) and BFO nanochains obtained after cleaning in dilute nitric acid solution (c, d).

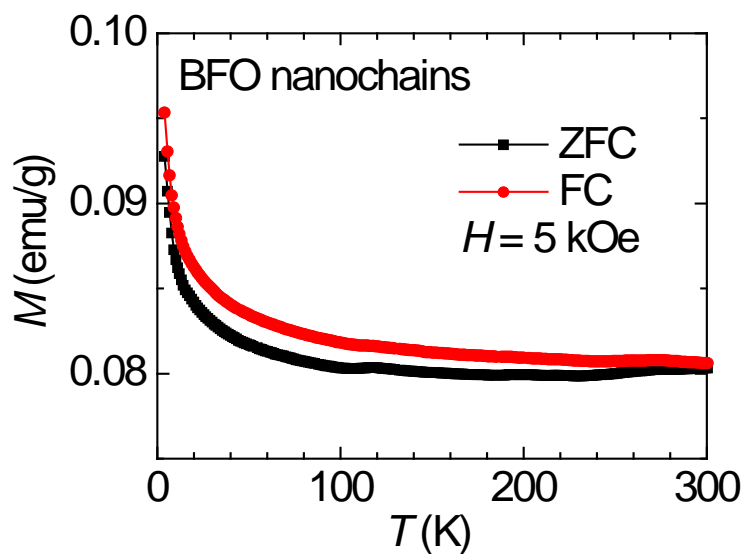

**Figure S6.** Magnetization of BFO nanochains as a function of temperature for zero-field-cooled (ZFC) and field-cooled (FC) modes measured in a magnetic field of 5 kOe.

**Table S1.** EDX spectrum analysis results of the atomic percent for  $\text{Bi}_{4.2\pm 0.60}\text{K}_{0.8\pm 0.12}\text{Fe}_2\text{O}_{9+\delta}$  nanobelts.\*

| Samples         | Atomic%<br>O<br>K_Series | Atomic%<br>K<br>K_Series | Atomic%<br>Fe<br>K_Series | Atomic%<br>Bi<br>M_Series | Samples         | Atomic%<br>O<br>K_Series | Atomic%<br>K<br>K_Series | Atomic%<br>Fe<br>K_Series | Atomic%<br>Bi<br>M_Series |
|-----------------|--------------------------|--------------------------|---------------------------|---------------------------|-----------------|--------------------------|--------------------------|---------------------------|---------------------------|
| <b>Sample A</b> |                          |                          |                           |                           | <b>Sample G</b> |                          |                          |                           |                           |
| Spectrum1       | 67.14762                 | 3.7202                   | 9.47967                   | 19.65251                  | Spectrum1       | 68.89456                 | 3.65575                  | 8.66631                   | 18.78338                  |
| Spectrum2       | 67.36723                 | 4.33542                  | 8.73441                   | 19.56293                  | Spectrum2       | 77.67585                 | 2.86015                  | 5.90012                   | 13.56388                  |
| Spectrum3       | 72.30125                 | 3.49141                  | 7.95648                   | 16.25086                  | Spectrum3       | 76.40348                 | 3.05695                  | 6.7798                    | 13.75977                  |
| Spectrum4       | 73.33473                 | 3.18178                  | 7.69884                   | 15.78465                  | Spectrum4       | 72.60213                 | 3.24275                  | 7.33779                   | 16.81732                  |
| Spectrum5       | 43.32582                 | 6.09364                  | 17.98173                  | 32.59881                  | Spectrum5       | 75.37449                 | 3.00363                  | 6.68987                   | 14.93202                  |
| <b>Sample B</b> |                          |                          |                           |                           | <b>Sample H</b> |                          |                          |                           |                           |
| Spectrum1       | 76.38185                 | 2.90094                  | 6.47274                   | 14.24446                  | Spectrum1       | 67.67336                 | 3.79213                  | 9.81376                   | 18.72074                  |
| Spectrum2       | 78.1685                  | 2.70433                  | 6.11341                   | 13.01375                  | Spectrum2       | 77.2296                  | 3.02211                  | 6.62492                   | 13.12337                  |
| Spectrum3       | 74.46482                 | 3.291                    | 6.80556                   | 15.43863                  | Spectrum3       | 70.32492                 | 2.88538                  | 10.61115                  | 16.17855                  |
| Spectrum4       | 73.43842                 | 3.40029                  | 7.42629                   | 15.735                    | <b>Sample I</b> |                          |                          |                           |                           |
| Spectrum5       | 79.83573                 | 2.14934                  | 4.45139                   | 13.56353                  | Spectrum1       | 76.173                   | 3.07336                  | 6.85564                   | 13.89799                  |
| <b>Sample C</b> |                          |                          |                           |                           | Spectrum2       | 74.45949                 | 2.49331                  | 5.84728                   | 17.19992                  |
| Spectrum1       | 74.52113                 | 3.02659                  | 7.24842                   | 15.20386                  | Spectrum3       | 78.33902                 | 2.88491                  | 6.01524                   | 12.76083                  |
| Spectrum2       | 63.67762                 | 4.07554                  | 11.35529                  | 20.89155                  | <b>Sample J</b> |                          |                          |                           |                           |
| Spectrum3       | 68.86365                 | 3.49373                  | 8.70824                   | 18.93438                  | Spectrum1       | 75.46947                 | 2.95378                  | 6.79683                   | 14.77992                  |
| Spectrum4       | 73.51319                 | 2.38528                  | 6.19255                   | 17.90898                  | Spectrum2       | 70.02698                 | 2.8256                   | 7.08818                   | 20.05924                  |
| Spectrum5       | 78.80101                 | 2.57233                  | 5.85329                   | 12.77338                  | Spectrum3       | 80.18475                 | 2.44554                  | 5.31813                   | 12.05158                  |
| <b>Sample D</b> |                          |                          |                           |                           | Spectrum4       | 71.9543                  | 3.4519                   | 7.4729                    | 17.1209                   |
| Spectrum1       | 76.11416                 | 3.30555                  | 6.5028                    | 14.07749                  | <b>Sample K</b> |                          |                          |                           |                           |
| Spectrum2       | 67.21686                 | 3.54087                  | 9.64403                   | 19.59824                  | Spectrum1       | 71.32803                 | 3.40428                  | 8.02902                   | 17.23867                  |
| Spectrum3       | 78.65385                 | 2.47407                  | 6.17385                   | 12.69822                  | Spectrum2       | 68.84116                 | 3.8148                   | 8.8849                    | 18.45914                  |
| Spectrum4       | 74.27336                 | 3.28186                  | 7.10985                   | 15.33494                  | Spectrum3       | 76.56029                 | 2.82632                  | 6.45537                   | 14.15802                  |
| Spectrum5       | 76.3706                  | 2.32812                  | 6.84575                   | 14.45553                  | Spectrum4       | 74.00261                 | 2.98409                  | 7.5385                    | 15.4748                   |
| <b>Sample E</b> |                          |                          |                           |                           | Spectrum5       | 76.68104                 | 2.80681                  | 6.68913                   | 13.82302                  |
| Spectrum1       | 62.92453                 | 4.23501                  | 10.89161                  | 21.94885                  | <b>Sample L</b> |                          |                          |                           |                           |
| Spectrum2       | 71.42111                 | 3.49587                  | 8.22434                   | 16.85869                  | Spectrum1       | 73.68294                 | 3.34994                  | 7.19969                   | 15.76743                  |
| Spectrum3       | 71.96433                 | 3.42613                  | 8.01243                   | 16.59711                  | Spectrum2       | 77.43375                 | 2.29315                  | 4.83838                   | 15.43471                  |
| Spectrum4       | 76.33911                 | 3.26822                  | 6.6032                    | 13.78946                  | Spectrum3       | 78.10831                 | 2.90855                  | 5.93599                   | 13.04715                  |
| Spectrum5       | 68.49602                 | 3.69909                  | 9.27094                   | 18.53395                  | <b>Sample M</b> |                          |                          |                           |                           |
| <b>Sample F</b> |                          |                          |                           |                           | Spectrum1       | 74.82156                 | 3.29134                  | 6.9399                    | 14.9472                   |
| Spectrum1       | 71.28347                 | 3.83251                  | 8.73569                   | 16.14833                  | Spectrum2       | 69.30002                 | 3.84382                  | 8.94192                   | 17.91423                  |
| Spectrum2       | 73.23496                 | 3.17102                  | 7.64272                   | 15.95131                  | Spectrum3       | 69.19326                 | 3.52103                  | 8.87839                   | 18.40732                  |
| Spectrum3       | 76.85841                 | 2.66708                  | 5.72892                   | 14.74559                  | Spectrum4       | 73.14534                 | 3.52619                  | 7.49289                   | 15.83558                  |
| Spectrum4       | 73.269                   | 3.06378                  | 7.86735                   | 15.79987                  | Spectrum5       | 75.42998                 | 3.04581                  | 6.15561                   | 15.3686                   |
| Spectrum5       | 59.62489                 | 4.12255                  | 12.78345                  | 23.4691                   | Spectrum6       | 72.64045                 | 3.3528                   | 8.12984                   | 15.87691                  |

**Table S1.** (Continued)

| Samples         | Atomic%<br>O<br>K_Series | Atomic%<br>K<br>K_Series | Atomic%<br>Fe<br>K_Series | Atomic%<br>Bi<br>M_Series | Samples         | Atomic%<br>O<br>K_Series | Atomic%<br>K<br>K_Series | Atomic%<br>Fe<br>K_Series | Atomic%<br>Bi<br>M_Series |
|-----------------|--------------------------|--------------------------|---------------------------|---------------------------|-----------------|--------------------------|--------------------------|---------------------------|---------------------------|
| <b>Sample N</b> |                          |                          |                           |                           | <b>Sample S</b> |                          |                          |                           |                           |
| Spectrum1       | 72.39411                 | 2.89284                  | 7.96372                   | 16.74933                  | Spectrum1       | 73.83192                 | 3.28054                  | 7.09963                   | 15.78791                  |
| Spectrum2       | 68.6136                  | 3.55519                  | 9.05238                   | 18.77884                  | Spectrum2       | 67.92727                 | 3.5374                   | 8.93763                   | 19.59771                  |
| Spectrum3       | 73.05707                 | 3.47256                  | 7.45437                   | 16.016                    | Spectrum3       | 72.10946                 | 3.54277                  | 7.86123                   | 16.48654                  |
| Spectrum4       | 76.16168                 | 2.94414                  | 6.91027                   | 13.98391                  | Spectrum4       | 68.89889                 | 3.44809                  | 9.25201                   | 18.40101                  |
| Spectrum5       | 76.18575                 | 2.75598                  | 6.23261                   | 14.82566                  | Spectrum5       | 63.55811                 | 3.57671                  | 11.50362                  | 21.36156                  |
| <b>Sample O</b> |                          |                          |                           |                           | <b>Sample T</b> |                          |                          |                           |                           |
| Spectrum1       | 75.57629                 | 3.03806                  | 6.74345                   | 14.64219                  | Spectrum1       | 74.61641                 | 2.75261                  | 6.43652                   | 16.19447                  |
| Spectrum2       | 73.00775                 | 3.40641                  | 7.63301                   | 15.95283                  | Spectrum2       | 75.00163                 | 3.106                    | 6.68879                   | 15.20357                  |
| Spectrum3       | 60.90742                 | 3.007                    | 16.04631                  | 20.03928                  | Spectrum3       | 77.70314                 | 2.8974                   | 6.19567                   | 13.2038                   |
| Spectrum4       | 76.12058                 | 2.65942                  | 6.1599                    | 15.0601                   | Spectrum4       | 78.99588                 | 2.49325                  | 6.05176                   | 12.45911                  |
| Spectrum5       | 77.79806                 | 2.32613                  | 4.75095                   | 15.12487                  | Spectrum5       | 70.17872                 | 3.70249                  | 7.90927                   | 18.20952                  |
| <b>Sample P</b> |                          |                          |                           |                           | <b>Sample U</b> |                          |                          |                           |                           |
| Spectrum1       | 64.10566                 | 3.75456                  | 10.95336                  | 21.18642                  | Spectrum1       | 75.88947                 | 2.97647                  | 7.01204                   | 14.12202                  |
| Spectrum2       | 78.10294                 | 2.48397                  | 7.00942                   | 12.40367                  | Spectrum2       | 76.01575                 | 2.93389                  | 7.41888                   | 13.63149                  |
| Spectrum3       | 77.96607                 | 2.80778                  | 6.99969                   | 12.22646                  | Spectrum3       | 76.80831                 | 2.92014                  | 6.75885                   | 13.5127                   |
| Spectrum4       | 78.14964                 | 2.89397                  | 6.29838                   | 12.65802                  | Spectrum4       | 76.82463                 | 3.15475                  | 6.16587                   | 13.85475                  |
| Spectrum5       | 67.80204                 | 3.52051                  | 10.01459                  | 18.66286                  | Spectrum5       | 76.13268                 | 3.08131                  | 6.33638                   | 14.44963                  |
| <b>Sample Q</b> |                          |                          |                           |                           | <b>Sample V</b> |                          |                          |                           |                           |
| Spectrum1       | 73.25785                 | 3.14968                  | 7.69777                   | 15.89471                  | Spectrum1       | 79.09938                 | 2.67194                  | 5.98887                   | 12.23981                  |
| Spectrum2       | 64.4161                  | 3.73795                  | 10.56503                  | 21.28092                  | Spectrum2       | 72.00544                 | 3.11214                  | 7.70979                   | 17.17262                  |
| Spectrum3       | 63.88316                 | 4.09469                  | 11.28985                  | 20.7323                   | Spectrum3       | 73.41149                 | 3.41302                  | 7.52027                   | 15.65522                  |
| Spectrum4       | 75.17301                 | 3.24677                  | 7.16985                   | 14.41036                  | Spectrum4       | 59.3329                  | 4.75895                  | 12.00114                  | 23.90702                  |
| Spectrum5       | 64.53414                 | 4.11582                  | 11.9677                   | 19.38234                  | Spectrum5       | 60.21961                 | 4.12946                  | 13.15246                  | 22.49847                  |
| <b>Sample R</b> |                          |                          |                           |                           | <b>Sample W</b> |                          |                          |                           |                           |
| Spectrum1       | 70.47198                 | 3.45855                  | 8.25168                   | 17.81779                  | Spectrum1       | 68.97516                 | 3.98884                  | 9.0812                    | 17.95479                  |
| Spectrum2       | 73.6297                  | 3.49491                  | 7.53681                   | 15.33858                  | Spectrum2       | 71.54544                 | 3.63658                  | 7.93939                   | 16.87859                  |
| Spectrum3       | 57.38057                 | 5.07507                  | 12.97863                  | 24.56573                  | Spectrum3       | 65.20673                 | 3.42065                  | 8.52887                   | 22.84375                  |
| Spectrum4       | 52.98713                 | 4.78748                  | 14.71737                  | 27.50802                  | Spectrum4       | 60.28223                 | 4.09564                  | 10.88405                  | 24.73809                  |
| Spectrum5       | 55.72513                 | 4.43579                  | 14.21034                  | 25.62874                  | Spectrum5       | 63.58463                 | 3.74687                  | 10.62995                  | 22.03855                  |
| Spectrum6       | 50.27627                 | 3.30946                  | 20.65142                  | 25.76285                  |                 |                          |                          |                           |                           |

\* For these EDX measurements, there is a considerable oxygen background in the instrument system, and the layered structure of BKFO could also adsorb extra oxygen, so the atomic percentages of oxygen are not the real oxygen contents in the sample. However, we can obtain a relative precise atomic ratio for Bi, K, and Fe. If we take Fe as the benchmark, Bi : K : Fe = 4.2(±0.60) : 0.8(±0.12) : 2. The atomic percent of oxygen in BKFO can be finally estimated through the valence balance analysis as well as the structure refinement. Then, the chemical formula for the BKFO nanobelts can be expressed as  $\text{Bi}_{4.2\pm0.60}\text{K}_{0.8\pm0.12}\text{Fe}_2\text{O}_{9+\delta}$ .

### Captions of the Supplementary Videos

**SVideo 1.** The appearance and the formation of Bi nanoparticles on a  $\text{Bi}_{4.2}\text{K}_{0.8}\text{Fe}_2\text{O}_{9+\delta}$  nanobelt.

**SVideo 2.** Ultra-fast fusion of two 3 nm Bi nanoparticles on the  $\text{Bi}_{4.2}\text{K}_{0.8}\text{Fe}_2\text{O}_{9+\delta}$  nanobelt surface.

**SVideo 3.** Slow fusion and crystallization of 10 nm Bi nanoparticles on the surface of a  $\text{Bi}_{4.2}\text{K}_{0.8}\text{Fe}_2\text{O}_{9+\delta}$  nanobelt.

**SVideo 4.** Dynamic SAED patterns of the  $\text{Bi}_{4.2}\text{K}_{0.8}\text{Fe}_2\text{O}_{9+\delta}$  nanobelt with Bi nanoparticles on it. The Bi (012) face diffraction points move in a circle due to the rotation movement of the Bi nanoparticles on the nanobelt.
